# Supplementary material for: Legacies of past land use have a stronger effect on forest carbon exchange than future climate change in a temperate forest landscape
Source: Copernicus journal article supplement (doi:10.5194/bg-15-5699-2018), 2018-09-25
Supplement: Supplementary file [file bg-15-5699-2018-supplement.pdf]

Supplement of Biogeosciences, 15, 5699–5713, 2018  
<https://doi.org/10.5194/bg-15-5699-2018-supplement>  
© Author(s) 2018. This work is distributed under  
the Creative Commons Attribution 4.0 License.

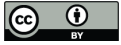

*Supplement of*

## **Legacies of past land use have a stronger effect on forest carbon exchange than future climate change in a temperate forest landscape**

**Dominik Thom et al.**

*Correspondence to:* Dominik Thom ([dominik.thom@uvm.edu](mailto:dominik.thom@uvm.edu))

The copyright of individual parts of the supplement might differ from the CC BY 4.0 License.

1 Section S1: Historical data

2 *Archival sources*

3 All archival sources were obtained from the archives of the Austrian Federal Forests  
4 (Österreichische Bundesforste), located in Purkersdorf, Austria. The material consists of maps,  
5 quantitative documentations (e.g., tables of growing stock per species and stand), and verbal  
6 descriptions of vegetation state, natural disturbances, and forest management. We compiled  
7 these sources by means of photographical documentation and subsequent transcription.

8

9 The full list of sources are:

- 10 Revisionsoperat des K.K. Wirtschaftsbezirkes Reichraming 1903-1912
- 11 Revisionsoperat für den K.K. Wirtschaftsbezirk Reichraming 1913-1922
- 12 Wirtschafts-Buch für den k.k. Wirtschaftsbezirk Reichraming 1903-1926
- 13 Reichraming 1938-1947 [*data for the period 1927-1937*]
- 14 Gedenkbuch 1950-1959 FV. Reichraming
- 15 Gedenkbuch 1960-1969 FV. Reichraming
- 16 Gedenkbuch Reichraming 1970-1983
- 17 Revisions-Operat für den K.K. Wirtschaftsbezirk Weyer (Steiermärkischer Religionsfonds)
- 18 1902-1911
- 19 Revisions-Operat für den K.K. Wirtschaftsbezirk Weyer (Steirm. Fondsforst) 1912-1921
- 20 Weyer 1928-1937

- 21 Altenmarkt 1938-1947
- 22 WB Weyer 1953-62, I
- 23 Wirtschaftsbuch begonnen mit dem Jahr 1902 (Weyer, Oberösterreichischer Religionsfonds)
- 24 Waldbesitz Ebenforst der Herrschaft Steyr. Flächentabelle, Bestandsbeschreibung,
- 25 Altersklassen Verzeichnis nach dem Stande 1898
- 26 R. Klöpferscher Waldbesitz Reichraming, Revier Ebenforst. Stand 1. April 1947 [Map]
- 27 R. Klöpfer'scher Waldbesitz Reichraming, Revier Weissenbach, Stand 1. April 1947 [Map]
- 28 Nikolaus'scher Waldbesitz Reichraming, Revier Weissenbach, Stand 1. I. 1964 [Map]
- 29 Nikolaus'scher Waldbesitz Reichraming, Revier Ebenforst. Stand 1. I. 1947 [Map]
- 30 Waldwirtschaftsplan 1974-1983 Forstwirtschaftsbezirk Karl Heinrich NICOLAUS, 4462
- 31 Reichraming.
- 32 Betriebseinrichtungs-Elabort vom Reviere Zeitschenberg O.Ö. 1907
- 33 W.B. Rosenau 1950-1959

34

35 From these sources, two types of data were extracted: First, spatially explicit data at the level  
36 of stands for the entire study landscape (see Fig. S1). These data represent the best available  
37 historical information, and were available for certain points in time (or multi-year inventory  
38 periods). Specifically, spatially explicit inventories on the forest state were available for the  
39 periods 1902/03, 1912/13, and 1926/27 (see Fig. S2). In addition, stand-level data on natural  
40 disturbances and anthropogenic disturbances (harvesting) were available for the period 1902 –  
41 1927. Second, time series of harvest levels were available for the entire study landscape with

42 annual resolution (source materials for the forest districts Weyer and Reichraming). These data  
43 were used to analyze the annual variation in harvest levels. They were furthermore analyzed for  
44 major disturbance events. In addition we screened the written protocols and examined  
45 meteorological data with a particular focus on detecting major disturbance events outside the  
46 two well-documented disturbance episodes 1917-1923 and 2007-2013. These analyses showed  
47 that no notable disturbance events occurred between the two major periods analyzed explicitly  
48 here.

49

### 50 *Identification of spatial units*

51 The delineation of forest stands started in the 1880s in our study area. In most cases, the  
52 boundaries of these stands were found to be still valid today, however, minor changes have  
53 been made over time (these are well-documented in the forest inventory sources). The spatial  
54 identification of stand units was done case by case, comparing toponyms, stand shapes and  
55 sizes between historical and recent maps. This approach allowed us to link data spatially  
56 between different time periods, and to evaluate the congruence of spatial units between  
57 periods. Minor reduction in the size of stand polygons was frequently detected, and was  
58 usually attributable to the construction of roads and other infrastructure. In some cases,  
59 changes in the stand configuration were made (particularly in remote high-elevation areas of  
60 the landscape), which were accounted for by subdividing the respective polygons.

61

### 62 *Data gaps*

63 Forests that were under federal ownership throughout the study period were found to be best  
64 documented. Two areas in the northern reaches of the landscape were under different

65 ownership, but were sufficiently well documented to retain them in our study. These areas  
66 have previously been part of the domain Lamberg, and cover about 1/6 of the total landscape.  
67 Nonetheless, a number of data gaps had to be filled to achieve a complete and seamless  
68 reconstruction of landscape history.

69 To fill data gaps regarding the temporal variation in natural disturbance and land use we  
70 assumed equivalence in relative changes, i.e., based on harvesting rates in a given year for a  
71 certain area, we assumed an equivalent change also for areas with missing data. For instance,  
72 after 1923 time series on annual harvest and natural disturbance were only available for the  
73 forest districts of Reichraming and Weyer (the two main historic forest districts in our study  
74 area, covering in total 4492.4 ha). Moreover, Reichraming is lacking data for the years 1938  
75 to 1946, hence the temporal variation of harvests was only based on the data for Weyer during  
76 this period. The data for Weyer terminates in 1952, i.e., only data from the district  
77 Reichraming was available for the following years. Where the time series of the two forest  
78 districts overlapped, we found similar trends in Reichraming and Weyer, supporting our  
79 assumption of equivalence between the two areas.

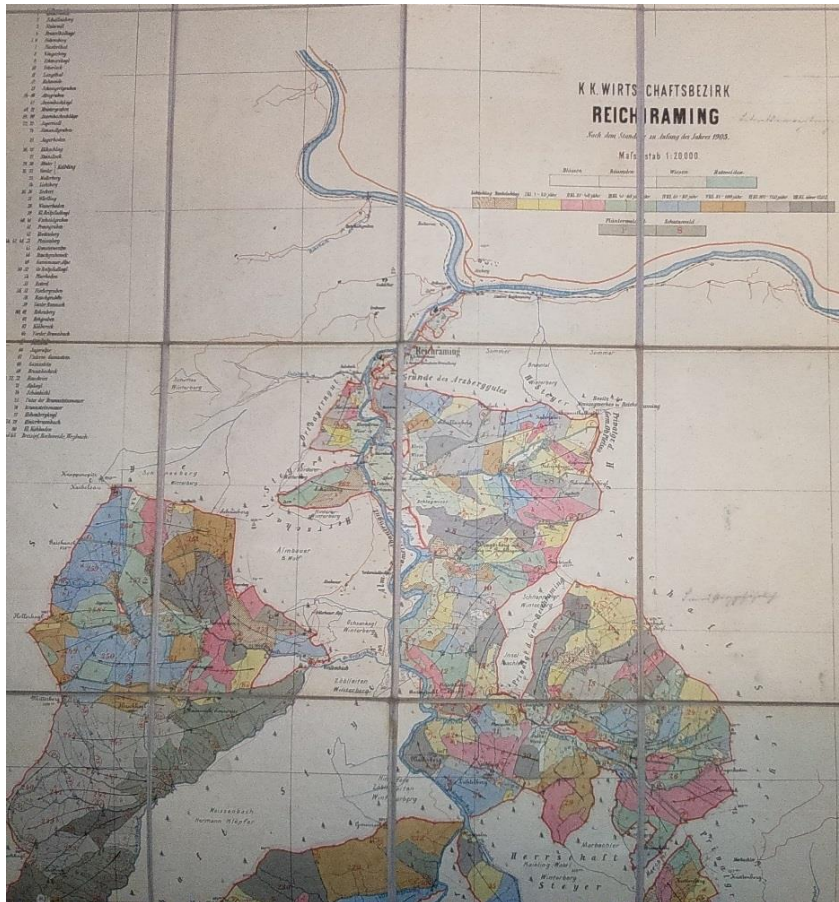

80

81 Fig. S1: Example for a map extracted from archival sources, showing a segment of the forest  
 82 district Reichraming in 1903. The colors denote different age classes of forest stands.



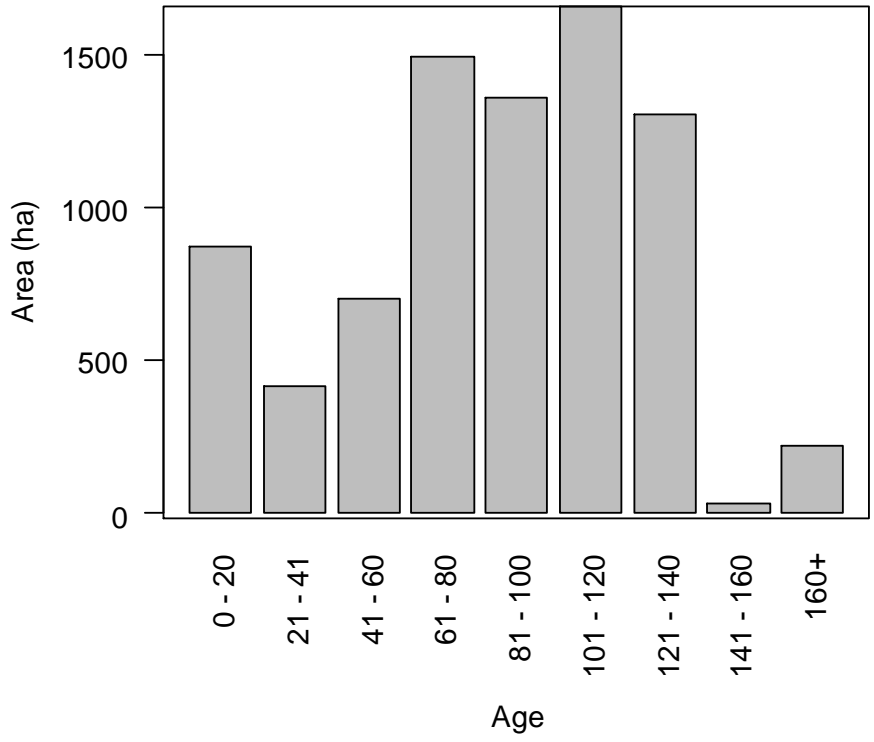

87

88 Fig. S3: Age distribution across the study landscape in 1905.



## 89 Section S2: Legacy spin-up

### 90 *Legacy spin-up procedure*

91 Management and disturbance history have a long-lasting influence on forest stands, and are  
92 important determinants of the state of a forest at any given point in time. In forest landscape  
93 models, the initialization of the state of the ecosystem accounts for legacies of past land use and  
94 disturbance. However, the information provided upon initialization differs considerably  
95 between models (e.g., Garcia-Gonzalo et al., 2007; Schumacher and Bugmann, 2006; Thom et  
96 al., 2017) and is crucially determined by model structure. For instance, while structural  
97 information plays only a minor role in cell-based simulation models (Scheller et al., 2007),  
98 individual-based models retain information about tree dimensions, canopy heights, gaps,  
99 regeneration etc. (Seidl et al., 2012). Yet, detailed information about forest ecosystem attributes  
100 for initializing simulation models is oftentimes not available (e.g., the spatial patterns of past  
101 disturbances or soil carbon stocks). This is important as uncertainties in initialization can have  
102 substantial influence on the simulated trajectories (Temperli et al. 2013).

103 Using models enables the simulation of past forest development, including past management  
104 and disturbances, in the form of a spin-up run. Models can thus help to create realistic and  
105 quantitative past and current states of forests. In a conventional spin-up, the model is run for an  
106 extended period of time under past forcing, and a snapshot of the simulated state is taken— after  
107 reaching a predefined stopping criterion (e.g., elapsed time, variation in certain C pools) – as  
108 the starting point for scenario analyses (Thornton and Rosenbloom 2005). This results in  
109 meaningful estimates regarding important ecosystem properties, and a system state that is  
110 consistent with the internal model logic. However, thus derived ecosystem states often do not  
111 correspond well with the information available from past and current observations. For instance,  
112 a stand that was recently disturbed in reality could be initialized in a late-seral stage from a

113 spin-up. This lack of structural realism strongly limits the utility of a traditional spin-up  
114 approach for initializing models for future projections. Factors such as the spatial distribution  
115 of age cohorts on the landscape have important implications for the future ecosystem dynamics,  
116 e.g., in the context of future susceptibility to disturbances. Therefore, we have developed a new  
117 spin-up approach, termed legacy spin-up, aiming to assimilate available data on the ecosystem  
118 state at a given point in time into the spin-up procedure, in order to improve the correspondence  
119 of the model state derived from spin-up with the observed state of the system.

120 Our approach differs from conventional model spin-up by considering the available information  
121 of the state of any given stand on the landscape for a reference point in time (Fig. S4). As with  
122 a conventional spin-up, the legacy spin-up starts by running the model over an extended period  
123 of time. This results in a large number of possible states that a given stand on the landscape can  
124 be in, given the prevailing climate and soil conditions as well as the past management and  
125 disturbance regime. From this state space of each stand, the legacy spin-up procedure selects  
126 the state that corresponds most closely to the reference values available for each stand (e.g.,  
127 observed values from forest inventories, remote sensing, or archival data). In other words, the  
128 legacy spin-up does not simply use the vegetation state of the last year of the spin-up run for all  
129 stands as initial condition for scenario analysis, but for each stand identifies the specific year of  
130 the spin-up run in which the state of the vegetation corresponds most closely to the reference  
131 conditions.

132 To improve the correspondence between the simulated state space for each stand and the  
133 reference conditions we harness the adaptive capacity of the agent-based forest management  
134 module (ABE) integrated into iLand (Rammer and Seidl, 2015). As detailed information on  
135 historic management is usually not available, we start the spin-up run using generic historic  
136 management. The emerging state space in the spin-up simulation is monitored and compared to

137 the reference values, and ABE adapts stand management iteratively to decrease the deviation  
138 between the simulated state space and the reference conditions.

139 For each stand polygon an a priori stand treatment program (STP) is created based on available  
140 information on past management regimes and the current state of the system (i.e., the reference  
141 state). Such a typical STP for managed forests in Central Europe includes planting, several  
142 thinnings and a final cut (Fig. S4). For instance, the initial planting could plant trees according  
143 to the target species shares (A in Fig. S4). During the simulation the defined management steps  
144 are executed (e.g., thinnings, B, final cut C). Periodically, the state of the forest is evaluated  
145 against the available reference data. A basic evaluation compares, for instance, the growing  
146 stock and species shares emerging from the simulation with the respective reference state, and  
147 calculates a similarity score (e.g., Bray-Curtis index). When the deviation between the emerging  
148 state space from the simulations and the reference state are not satisfactorily, the STP for the  
149 next rotation can be altered. In the example in Fig. S4, the simulated share of spruce was lower  
150 than the spruce share in the reference state, indicating that spruce was likely favored by past  
151 management, either by planting spruce (C) or by favoring spruce via selective thinnings. This  
152 information is incorporated in the spin-up run, which henceforth uses a modified STP for the  
153 given stand and the next rotation (D). This process of iterative adaptation of historic  
154 management to increase the similarity between the emerging system state and the reference  
155 state is repeated several times. Whenever the simulated forest state has a higher similarity to  
156 the reference state than in previous iterations, the state of the stand is stored within a snapshot  
157 database (including all relevant information on ecosystem pools and structures), potentially  
158 overwriting previously saved states with lower similarity values. This process is executed for  
159 all stands on the landscape in parallel. The final step of the process (after, e.g., 1000 years of  
160 spin-up) is for each stand to load the saved forest state from the database (i.e., the state that had  
161 the highest similarity score relative to the reference state throughout the iterative spin-up run),

162 and to create a single landscape “composite” from all of these saved stand states. This composite  
163 is subsequently used as the initial state of the landscape for scenario simulations. The spin-up  
164 procedure also creates detailed log files which can be further analyzed (e.g., regarding the  
165 deviation of the initialized landscape from the reference state). Technically, the logic of the  
166 legacy spin-up is implemented as a JavaScript library. The library is used by application specific  
167 JavaScript code (e.g., the historic management regime for the given landscape, or the  
168 calculation of similarity indices based on available data) that is provided by the user.

169 One big advantage of the legacy spin-up procedure is that it can accommodate varying degrees  
170 of data availability. If, for instance, only information on stand ages are available, age is the sole  
171 criterion used to determine the reference state. However, in many cases there is also information  
172 on species composition, growing stock, etc. available (as was the case in the historical data from  
173 the 1905 inventory of the landscape studied here), which can be jointly assimilated into the  
174 spin-up procedure. If density or growing stock is available in addition to age and species, for  
175 instance, the legacies of past non-stand-replacing disturbances and management operations  
176 such as thinnings can be captured more faithfully in the spin-up. However, even if no  
177 information on the reference vegetation state is available, the procedure can be used to generate  
178 a first estimate of landscape-scale vegetation structure and composition based on simulations  
179 of historic management and disturbance regimes. The legacy spin-up thus combines the  
180 advantages of a conventional spin-up (model-internal consistency of the initialized ecosystem  
181 states) with the assimilation of available data on the study system for initializing the model.

182

### 183 *Application of the legacy spin-up in the current analysis*

184 For the current study, our aim was to initialize the historic landscape based on stand-level forest  
185 management and planning data for 1905, extracted from historical archives. The available

186 information on reference states from archival sources was species composition and age classes  
187 per stand, as well as stand-level growing stock. Consequently we defined reference states as the  
188 species-specific growing stock and age for every stand, also accounting the possibility of  
189 multiple age classes within a stand (representing multilayer and multicohort stands). We  
190 developed species and site specific a priori STPs (planting, tending, thinning and harvesting  
191 activities) based on common forest management practice in Austria during the 19<sup>th</sup> century  
192 (Stifter 1994). Initially, the share of species in plantings was assumed equal to the reference  
193 species share for each stand. If the Bray-Curties Index, a measure for the similarity of the  
194 simulated species composition to the reference state, was above a user-defined threshold at the  
195 end of a simulation period, ABE autonomously adapted planting activities, aiming for a species  
196 composition closer to the reference state. Shade-intolerant species were planted in groups, while  
197 shade-tolerant species were planted in equal spacing in order to improve the competitiveness  
198 of shade-intolerant species, and increase the spatial realism of the emerging species distribution  
199 patterns. Tending and thinning were specified by the stand age at which these activities are  
200 conducted, the amount of timber removed in each intervention, the minimum dbh (diameter at  
201 breast height) for tree removal, and the relative share of trees to be removed per dbh class (e.g.,  
202 in order to differentiate between thinnings from below and from above). The simulation period  
203 was defined by the reference stand age. A combined index including the Bray-Curtis-Similarity  
204 Index (for tree species composition) and the relative deviation from the reference growing stock  
205 level were used to determine the best approximation of the simulated vegetation to the reference  
206 state. For an initial estimate of belowground carbon pools in year 0 of the spin-up we used data  
207 of Kalkalpen National Park (KANP) as derived by Thom and others (2017) for the year 1999.  
208 Only simulated states > year 100 of legacy spin-up were considered for initialization, in order  
209 to allow belowground carbon pools to adjust to historical management.

210 We started the legacy spin-up procedure from bare ground, assuming reduced nitrogen pools as  
211 described in the section “Landscape initialization and drivers“ (as a result of historic  
212 management such as litter raking). We ran the legacy spin-up for 1000 years, assuming constant  
213 historic climate conditions. In total 2079 stands were simulated in the legacy spin-up, and  
214 subsequently reassembled to the landscape representing the state of forest vegetation in 1905.  
215 Our evaluations of the spin-up procedure indicated a good match between reference conditions  
216 determined from archival sources and simulation for tree species composition (Fig. S5) and  
217 growing stock (Fig. S6) on the landscape.

218

219

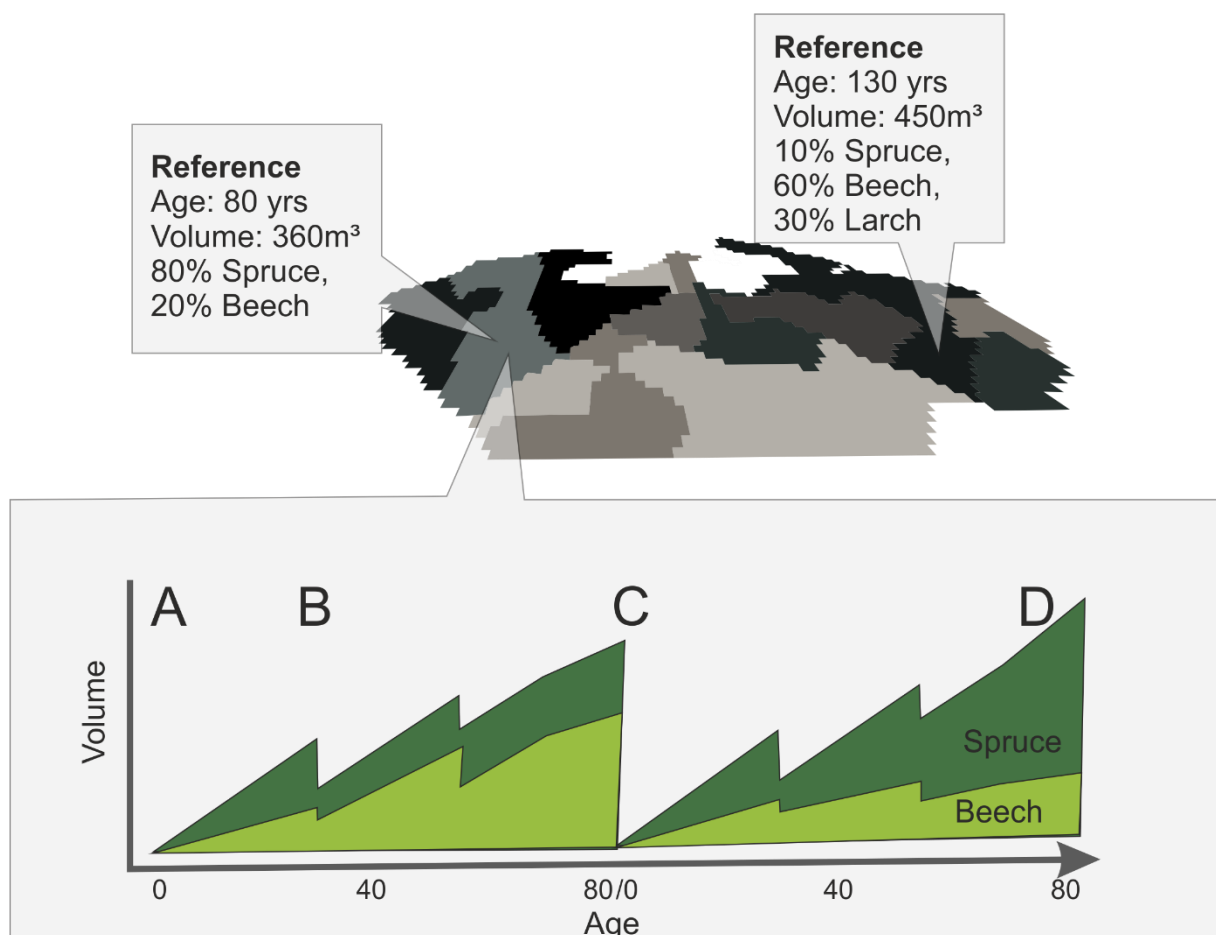

220

221 Fig. S4: Concept of the legacy spin-up. Upper panel: a fictitious landscape with differing  
222 reference states for the spin-up. Lower panel: The development of one stand over two simulated  
223 rotations over the course of the legacy spin-up. Letters A to D indicate different phases of the  
224 process: A initial planting of target vegetation, B thinnings, C final cut, D modified stand  
225 treatment program (STP) for the next rotation period (see text for details).

226

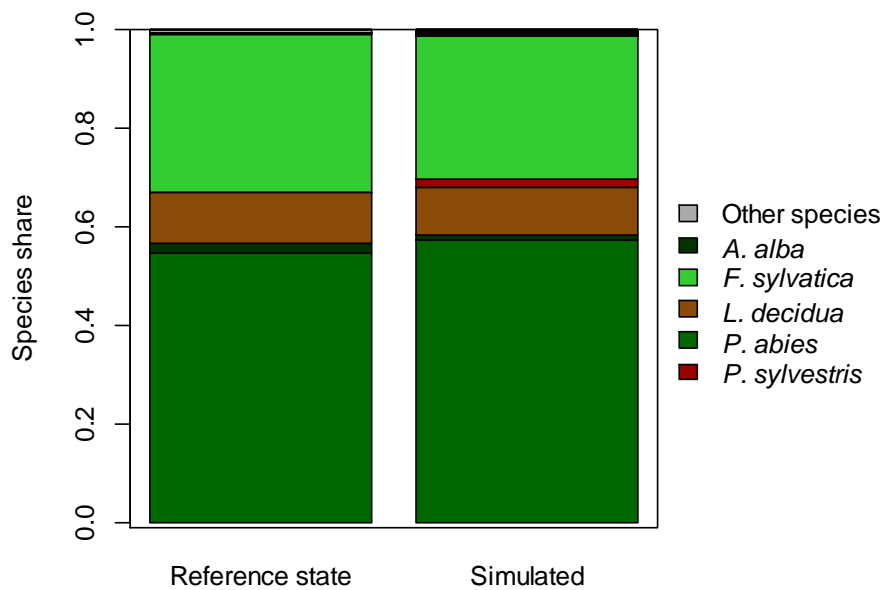

227

228 Fig. S5: Reference state (from archival sources) and simulated tree species composition  
229 emerging as the end point of a legacy spin-up for the year 1905. Species share refers to the  
230 relative growing stock per species (1 = 100%).

231

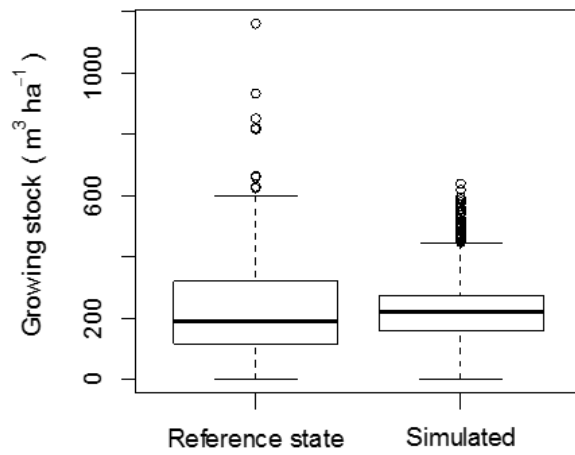

232

233 Fig. S6: Reference state (from archival sources) and simulated growing stock emerging as end  
234 point of a legacy spin-up for the year 1905. Each observation refers to a stand polygon (n=  
235 2079). Mean values: Reference state 216.9 m³ ha<sup>-1</sup> and simulated 207.0 m³ ha<sup>-1</sup>.

236



237 **References**

- 238 Garcia-Gonzalo, J., Peltola, H., Zubizarreta Gerendiain, A. and Kellomäki, S.: Impacts of forest  
239 landscape structure and management on timber production and carbon stocks in the boreal  
240 forest ecosystem under changing climate, *For. Ecol. Manage.*, 241(1–3), 243–257,  
241 doi:10.1016/j.foreco.2007.01.008, 2007.
- 242 Rammer W, Seidl R. 2015. Coupling human and natural systems: Simulating adaptive  
243 management agents in dynamically changing forest landscapes. *Glob Environ Chang*  
244 35:475–85.
- 245 Scheller, R. M., Domingo, J. B., Sturtevant, B. R., Williams, J. S., Rudy, A., Gustafson, E. J.  
246 and Mladenoff, D. J.: Design, development, and application of LANDIS-II, a spatial  
247 landscape simulation model with flexible temporal and spatial resolution, *Ecol. Modell.*,  
248 201(3–4), 409–419, doi:10.1016/j.ecolmodel.2006.10.009, 2007.
- 249 Schumacher, S. and Bugmann, H.: The relative importance of climatic effects, wildfires and  
250 management for future forest landscape dynamics in the Swiss Alps, *Glob. Chang. Biol.*,  
251 12(8), 1435–1450, doi:10.1111/j.1365-2486.2006.01188.x, 2006.
- 252 Seidl, R., Rammer, W., Scheller, R. M. and Spies, T. A.: An individual-based process model to  
253 simulate landscape-scale forest ecosystem dynamics, *Ecol. Modell.*, 231, 87–100,  
254 doi:10.1016/j.ecolmodel.2012.02.015, 2012.
- 255 Stifter, A. 1994. Österreichs Wald – Vom Urwald zur Waldwirtschaft. Österreichischer  
256 Forstverein, Wien, Austria, pp 1 – 544.
- 257 Temperli C, Zell J, Bugmann H, Elkin C. 2013. Sensitivity of ecosystem goods and services  
258 projections of a forest landscape model to initialization data. *Landsc Ecol* 28:1337–52.

259 Thom D, Rammer W, Dirnböck T, Müller J, Kobler J, Katzensteiner K, Helm N, Seidl R. 2017.  
260 The impacts of climate change and disturbance on spatio-temporal trajectories of  
261 biodiversity in a temperate forest landscape. *J Appl Ecol* 54:28–38.

262 Thornton P, Rosenbloom NA. 2005. Ecosystem model spin-up: Estimating steady state  
263 conditions in a coupled terrestrial carbon and nitrogen cycle mode. *Ecol Modell* 189:25–  
264 48.

265

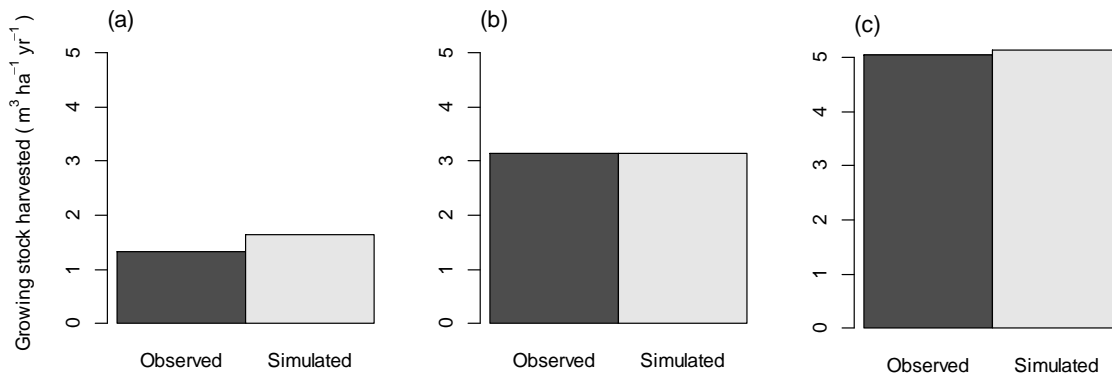

267

268 Fig. S7: Growing stock (timber volume over bark) harvested in the periods (a) 1924 – 1952, (b)  
269 1956 – 1973, and (c) 1974 – 1983, as reconstructed from archival sources (observed) and  
270 simulated with iLand. Simulation data are for the baseline scenario, i.e. assuming historic  
271 natural disturbance and management regimes.

272

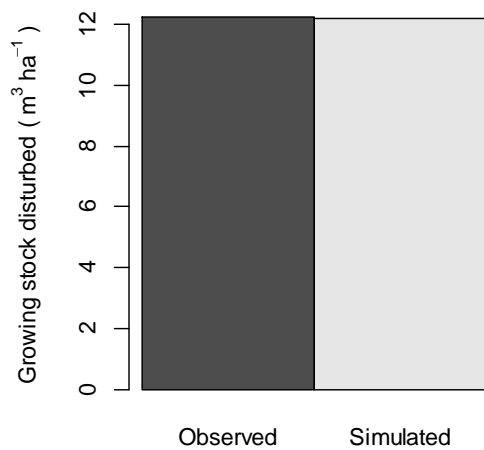

273

274 Fig. S8: Observed and simulated growing stock disturbed during the second disturbance episode  
275 (2007 – 2013). Observed values were derived from disturbance inventories of Kalkalpen  
276 National Park, whereas simulated values are for the baseline scenario (i.e., assuming historic  
277 natural disturbances and management regimes.

278

279

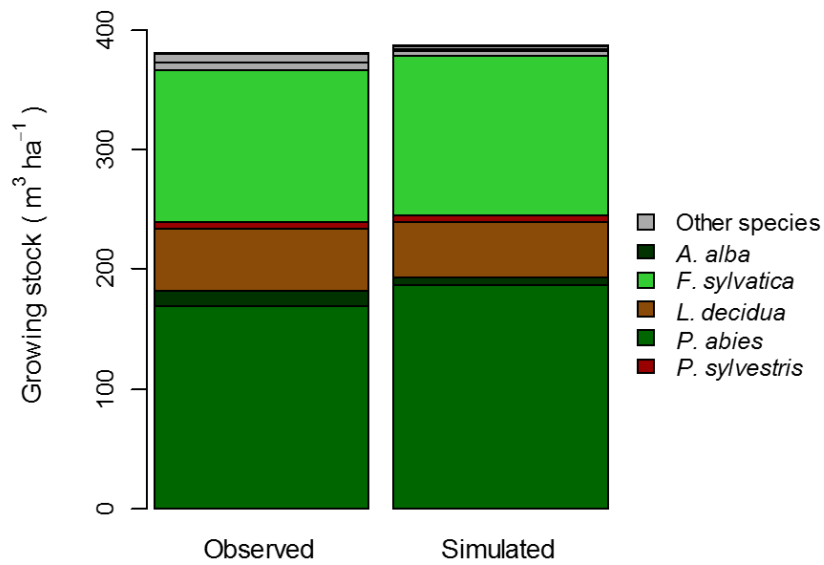

280

281 Fig. S9: Observed and simulated growing stock by tree species in the year 1999. Observations  
 282 are from forest management and planning data of the Austrian Federal Forests, whereas  
 283 simulated data are for the baseline scenario (i.e., assuming historic natural disturbance and  
 284 management regimes).

285

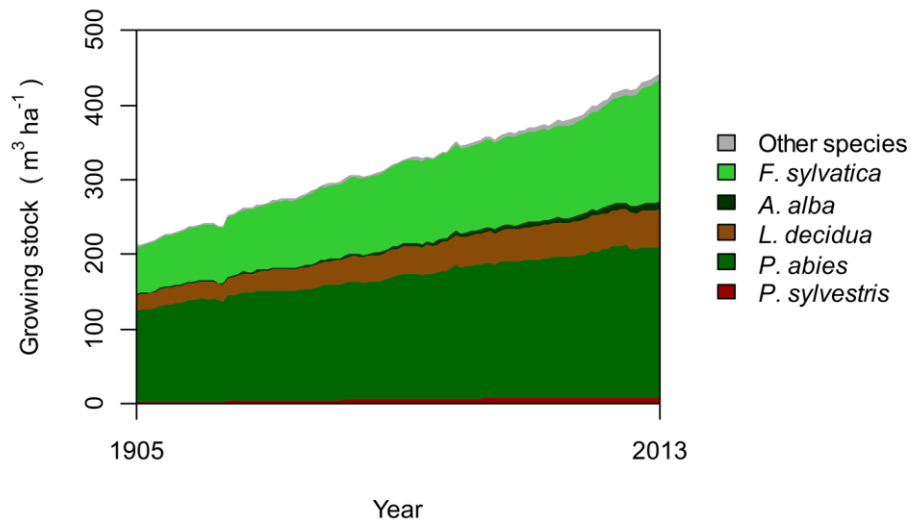

286

287 Fig. S10: Growing stock by tree species over time, reconstructed by means of simulation  
 288 modeling. Data are for the baseline scenario (i.e., assuming historic natural disturbance and  
 289 management regimes).

290

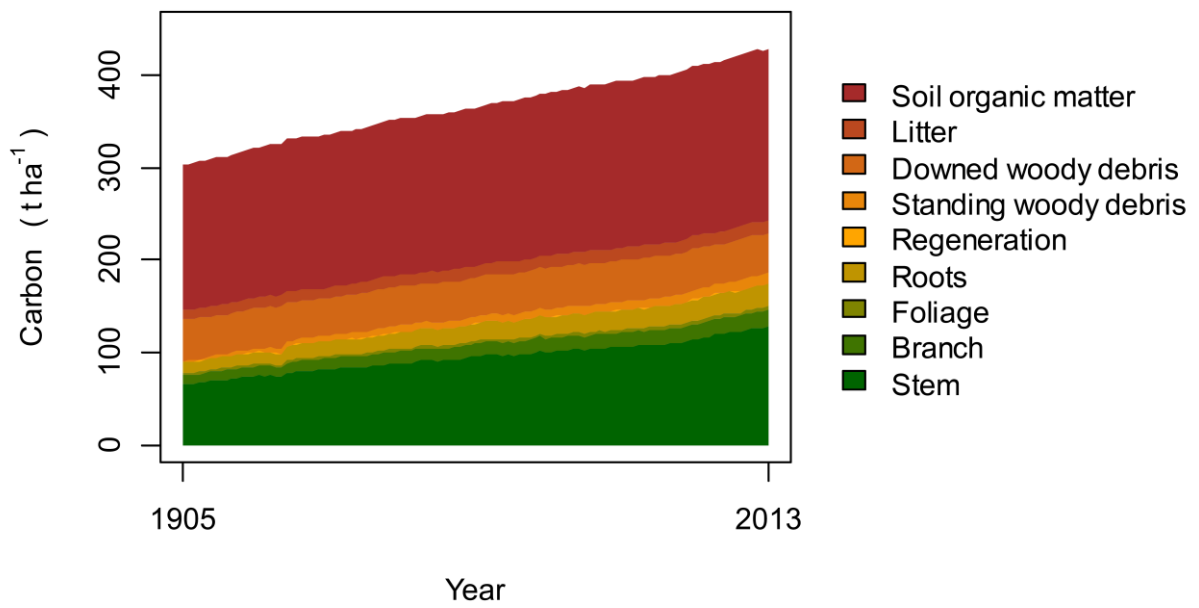

291

292 Fig. S11: Carbon storage per compartment, reconstructed by means of simulation modeling.

293 Data are for the baseline scenario (i.e., assuming historic natural disturbance and management

294 regimes).
